# Supplementary material for: Tracing Antibiotic Resistance Genes along the Irrigation Water Chain to Chive: Does Tap or Surface Water Make a Difference?
Source: MDPI journal article supplement (doi:10.3390/antibiotics10091100), 2021-09-11
Supplement: s1 [file s1]

**Supplementary Tables** provided for manuscript *Tracing Antibiotic Resistance Genes along the Irrigation Water Chain to Chive: Does Tap or Surface Water Make a Difference?*

Gekenidis, M.-T.; Walsh, F.; Drissner, D.

**Table S1.** Fold changes of ARGs calculated for R-chive using D-chive as reference, grouped by antibiotic class. All ARGs displayed in Figure 1 for sampling-1 are listed; a few rare ARGs were therefore omitted from the list. Insertional seq., insertional sequence; plasmid incomp., plasmid incompatibility.

| Gene Name            | Target Antibiotics (Major) | Functional Classification | Fold Change |
|----------------------|----------------------------|---------------------------|-------------|
| <i>aacC2</i>         | aminoglycoside             | deactivate                | 0.704       |
| <i>aadA</i>          | aminoglycoside             | deactivate                | 0.557       |
| <i>aadA</i>          | aminoglycoside             | deactivate                | 3.169       |
| <i>aadA5</i>         | aminoglycoside             | deactivate                | 1.342       |
| <i>aadA</i>          | aminoglycoside             | deactivate                | 0.319       |
| <i>aadA5</i>         | aminoglycoside             | deactivate                | 1.496       |
| <i>aadA</i>          | aminoglycoside             | deactivate                | 1.253       |
| <i>aadA</i>          | aminoglycoside             | deactivate                | 0.827       |
| <i>aadA9</i>         | aminoglycoside             | deactivate                | 1.278       |
| <i>aadA</i>          | aminoglycoside             | deactivate                | 1.049       |
| <i>aadA9</i>         | aminoglycoside             | deactivate                | 0.797       |
| <i>str</i>           | aminoglycoside             | deactivate                | 1.524       |
| <i>strB</i>          | aminoglycoside             | deactivate                | 1.232       |
| <i>cmlA</i>          | amphenicol                 | efflux                    | 0.825       |
| <i>floR</i>          | amphenicol                 | efflux                    | 0.942       |
| <i>yidY/mdtL</i>     | amphenicol                 | efflux                    | 0.659       |
| <i>mdtL</i>          | amphenicol                 | efflux                    | 185.878     |
| <i>cmxA</i>          | amphenicol                 | efflux                    | 0.221       |
| <i>catA1</i>         | amphenicol                 | deactivate                | 1.042       |
| <i>rarD</i>          | amphenicol                 | efflux                    | 1.089       |
| <i>rarD</i>          | amphenicol                 | efflux                    | 95.289      |
| <i>blaACT</i>        | $\beta$ -lactam            | deactivate                | 0.892       |
| <i>ampC</i>          | $\beta$ -lactam            | deactivate                | 16.126      |
| <i>ampC</i>          | $\beta$ -lactam            | deactivate                | 79.731      |
| <i>blaCMY</i>        | $\beta$ -lactam            | deactivate                | 21.359      |
| <i>ampC</i>          | $\beta$ -lactam            | deactivate                | 0.894       |
| <i>blaMOX/blaCMY</i> | $\beta$ -lactam            | deactivate                | 2.102       |
| <i>blaSHV</i>        | $\beta$ -lactam            | deactivate                | 1.196       |
| <i>bla1</i>          | $\beta$ -lactam            | deactivate                | 1.133       |
| <i>blaOXA</i>        | $\beta$ -lactam            | deactivate                | 3.128       |
| <i>cphA</i>          | $\beta$ -lactam            | deactivate                | 4.479       |
| <i>blaL1</i>         | $\beta$ -lactam            | deactivate                | 3.264       |
| <i>blaCMY</i>        | $\beta$ -lactam            | deactivate                | 108.744     |
| <i>blaACT</i>        | $\beta$ -lactam            | deactivate                | 0.424       |
| <i>blaACT</i>        | $\beta$ -lactam            | deactivate                | 1.921       |
| <i>blaCMY</i>        | $\beta$ -lactam            | deactivate                | 1.725       |
| <i>blaFOX</i>        | $\beta$ -lactam            | deactivate                | 2.079       |
| <i>blaCTX-M</i>      | $\beta$ -lactam            | deactivate                | 1.052       |
| <i>blaCTX-M</i>      | $\beta$ -lactam            | deactivate                | 1.214       |
| <i>blaSFO</i>        | $\beta$ -lactam            | deactivate                | 1.554       |

|                                           |                     |            |         |
|-------------------------------------------|---------------------|------------|---------|
| <i>mecA</i>                               | β-lactam            | protection | 4.126   |
| <i>blaTEM</i>                             | β-lactam            | deactivate | 0.615   |
| <i>blaPER</i>                             | β-lactam            | deactivate | 0.701   |
| <i>KPC</i>                                | β-lactam            | deactivate | 2.500   |
| <i>acrB</i>                               | MDR                 | efflux     | 50.795  |
| <i>acrF</i>                               | MDR                 | efflux     | 120.276 |
| <i>adeA</i>                               | MDR                 | efflux     | 0.499   |
| <i>acrA</i>                               | MDR                 | efflux     | 58.236  |
| <i>acrA</i>                               | MDR                 | efflux     | 20.087  |
| <i>emrD</i>                               | MDR                 | efflux     | 0.421   |
| <i>uidA</i>                               | MDR                 | efflux     | 62.231  |
| <i>mdtE</i>                               | MDR                 | efflux     | 138.788 |
| <i>mdtG</i>                               | MDR                 | efflux     | 69.851  |
| <i>yceL/mdtH</i>                          | MDR                 | efflux     | 0.799   |
| <i>mdtH</i>                               | MDR                 | efflux     | 35.919  |
| <i>mexA</i>                               | MDR                 | efflux     | 1.261   |
| <i>acrR</i>                               | MDR                 | regulator  | 2.020   |
| <i>acrR</i>                               | MDR                 | regulator  | 70.959  |
| <i>qacEΔ1</i>                             | MDR                 | efflux     | 0.559   |
| <i>emrB/qacA</i>                          | MDR                 | efflux     | 0.753   |
| <i>qacEΔ1</i>                             | MDR                 | efflux     | 0.636   |
| <i>oprD</i>                               | MDR                 | efflux     | 0.759   |
| <i>oprJ</i>                               | MDR                 | efflux     | 0.551   |
| <i>ttgA</i>                               | MDR                 | efflux     | 2.788   |
| <i>mepA</i>                               | MDR                 | efflux     | 4.327   |
| <i>mexE</i>                               | MDR                 | efflux     | 1.869   |
| <i>mexF</i>                               | MDR                 | efflux     | 0.451   |
| <i>acrA</i>                               | MDR                 | efflux     | 0.268   |
| <i>acrA</i>                               | MDR                 | efflux     | 1.342   |
| <i>tolC</i>                               | MDR                 | efflux     | 63.455  |
| <i>tolC</i>                               | MDR                 | efflux     | 2.713   |
| <i>tolC</i>                               | MDR                 | efflux     | 5.902   |
| <i>acrR</i>                               | MDR                 | regulator  | 23.844  |
| <i>qacEΔ1</i>                             | MDR                 | efflux     | 0.711   |
| <i>emrB/qacA</i>                          | MDR                 | efflux     | 0.627   |
| <i>marR</i>                               | MDR                 | regulator  | 1.009   |
| <i>mdtF</i>                               | MDR                 | efflux     | 204.883 |
| <i>ISPps</i>                              | insertional seq.    | MGE        | 2.562   |
| <i>ISSm2</i>                              | insertional seq.    | MGE        | 0.473   |
| <i>ISAbas3</i>                            | insertional seq.    | MGE        | 0.496   |
| <i>ISEfm1</i>                             | insertional seq.    | MGE        | 0.948   |
| <i>intI1</i>                              | integrase           | MGE        | 1.903   |
| <i>intI1</i>                              | integrase           | MGE        | 2.668   |
| <i>intI3</i>                              | integrase           | MGE        | 7.168   |
| <i>intI1</i>                              | integrase           | MGE        | 1.423   |
| <i>intI3</i>                              | integrase           | MGE        | 4.967   |
| <i>IncN_rep</i>                           | plasmid incomp.     | MGE        | 0.643   |
| <i>IncP_oriT</i>                          | plasmid incomp.     | MGE        | 3.205   |
| <i>repA</i>                               | plasmid replication | MGE        | 0.931   |
| <i>tetR</i>                               | plasmid replication | MGE        | 0.847   |
| IS6 <i>tnpA</i> , IS26, ISG 6, Tn24, Tn25 | transposase         | MGE        | 10.648  |
| IS6 Group, <i>tnpA</i> , IS6100, ISG 6    | transposase         | MGE        | 1.809   |

|                                           |              |            |        |
|-------------------------------------------|--------------|------------|--------|
| IS4 Group, <i>tnpA</i> , IS4, ISG 4, Tn22 | transposase  | MGE        | 0.677  |
| IS21 Group, <i>tnpA</i> , Tn21, ISG 21    | transposase  | MGE        | 4.928  |
| IS6 Group, IS1216                         | transposase  | MGE        | 15.879 |
| IS6 Group, <i>tnpA</i>                    | transposase  | MGE        | 15.587 |
| <i>ermF</i>                               | MLSB         | protection | 0.636  |
| <i>lmrA</i>                               | MLSB         | efflux     | 10.904 |
| <i>matA/mel</i>                           | MLSB         | efflux     | 0.243  |
| <i>mphA</i>                               | MLSB         | deactivate | 0.719  |
| <i>mefA</i>                               | MLSB         | efflux     | 0.287  |
| <i>vgaB</i>                               | MLSB         | efflux     | 1.531  |
| <i>oleC</i>                               | MLSB         | efflux     | 2.219  |
| <i>sul2</i>                               | sulfonamide  | protection | 1.306  |
| <i>folA</i>                               | sulfonamide  | protection | 1.298  |
| <i>folP</i>                               | sulfonamide  | protection | 0.931  |
| <i>folP</i>                               | sulfonamide  | protection | 0.882  |
| <i>sul3</i>                               | sulfonamide  | protection | 0.648  |
| <i>sul1</i>                               | sulfonamide  | protection | 2.355  |
| <i>tetX</i>                               | tetracycline | deactivate | 0.778  |
| <i>tetR</i>                               | tetracycline | regulator  | 0.317  |
| <i>tetR</i>                               | tetracycline | regulator  | 3.624  |
| <i>tetPB</i>                              | tetracycline | protection | 1.063  |
| <i>tetPB</i>                              | tetracycline | protection | 0.827  |
| <i>tetPB</i>                              | tetracycline | protection | 1.029  |
| <i>tetPB</i>                              | tetracycline | protection | 0.712  |
| <i>tetA</i>                               | tetracycline | efflux     | 0.218  |
| <i>tetA/B</i>                             | tetracycline | efflux     | 4.371  |
| <i>tetC</i>                               | tetracycline | efflux     | 4.873  |
| <i>tetG</i>                               | tetracycline | efflux     | 0.955  |
| <i>tetG</i>                               | tetracycline | efflux     | 1.003  |
| <i>tetA/B</i>                             | tetracycline | efflux     | 5.945  |
| <i>tetL</i>                               | tetracycline | efflux     | 0.754  |
| <i>tetL</i>                               | tetracycline | efflux     | 1.277  |
| <i>tetC</i>                               | tetracycline | efflux     | 3.465  |
| <i>tetE</i>                               | tetracycline | efflux     | 2.163  |
| <i>vanC</i>                               | vancomycin   | protection | 0.260  |
| <i>vanC</i>                               | vancomycin   | protection | 0.351  |
| <i>vanTC</i>                              | vancomycin   | protection | 0.268  |
| <i>vanRA</i>                              | vancomycin   | protection | 1.139  |
| <i>vanC2/vanC3</i>                        | vancomycin   | protection | 0.257  |
| <i>vanRC</i>                              | vancomycin   | protection | 0.353  |
| <i>vanRC4</i>                             | vancomycin   | protection | 0.939  |
| <i>vanSC</i>                              | vancomycin   | protection | 0.279  |
| <i>vanTC</i>                              | vancomycin   | protection | 0.558  |

---

**Table S2.** Fold changes of ARGs calculated for R-chive using D-chive as reference, grouped by antibiotic class. All ARGs displayed in Figure 1 for sampling-4 are listed; a few rare ARGs were therefore omitted from the list. Insertional seq., insertional sequence; plasmid incomp., plasmid incompatibility.

| Gene Name                                 | Target Antibiotics (Major) | Functional Classification | Fold Change |
|-------------------------------------------|----------------------------|---------------------------|-------------|
| <i>strB</i>                               | aminoglycoside             | deactivate                | 1.902       |
| <i>cmlA</i>                               | amphenicol                 | efflux                    | 0.665       |
| <i>bla1</i>                               | $\beta$ -lactam            | deactivate                | 1.084       |
| <i>blaCMY</i>                             | $\beta$ -lactam            | deactivate                | 1.327       |
| <i>KPC</i>                                | $\beta$ -lactam            | deactivate                | 1.031       |
| <i>emrB/qacA</i>                          | MDR                        | efflux                    | 0.829       |
| <i>mexE</i>                               | MDR                        | efflux                    | 0.577       |
| <i>mexF</i>                               | MDR                        | efflux                    | 3.952       |
| <i>tolC</i>                               | MDR                        | efflux                    | 0.951       |
| <i>emrB/qacA</i>                          | MDR                        | efflux                    | 1.142       |
| ISPps                                     | insertional seq.           | MGE                       | 1.121       |
| IS6 <i>tnpA</i> , IS26, ISG 6, Tn24, Tn25 | transposase                | MGE                       | 0.966       |
| IS6 Group, <i>tnpA</i> , IS6100, ISG 6    | transposase                | MGE                       | 0.666       |
| IS4 Group, <i>tnpA</i> , IS4, ISG 4, Tn22 | transposase                | MGE                       | 1.257       |
| IS6 Group, IS1216                         | transposase                | MGE                       | 0.400       |
| IS6 Group, <i>tnpA</i>                    | transposase                | MGE                       | 0.258       |
| <i>tetA/B</i>                             | tetracycline               | efflux                    | 0.644       |
| <i>tetPB</i>                              | tetracycline               | protection                | 1.082       |

**Table S3.** Fold changes of ARGs calculated for R-chive using D-chive as reference, grouped by antibiotic class. All ARGs displayed in Figure 1 for sampling-5 are listed; a few rare ARGs were therefore omitted from the list. Insertional seq., insertional sequence; plasmid incomp., plasmid incompatibility.

| Gene Name                                 | Target Antibiotics (Major) | Functional Classification | Fold Change |
|-------------------------------------------|----------------------------|---------------------------|-------------|
| <i>aac(6')-Ib</i>                         | aminoglycoside             | deactivate                | 0.821       |
| <i>aadA</i>                               | aminoglycoside             | deactivate                | 2.161       |
| <i>strB</i>                               | aminoglycoside             | deactivate                | 745.022     |
| <i>blaOXA</i>                             | $\beta$ -lactam            | deactivate                | 1.593       |
| <i>blaCMY</i>                             | $\beta$ -lactam            | deactivate                | 5.362       |
| <i>blaACT</i>                             | $\beta$ -lactam            | deactivate                | 39.447      |
| <i>blaFOX</i>                             | $\beta$ -lactam            | deactivate                | 0.001       |
| <i>KPC</i>                                | $\beta$ -lactam            | deactivate                | 72.189      |
| <i>emrD</i>                               | MDR                        | efflux                    | 1.474       |
| <i>qacE<math>\Delta</math>1</i>           | MDR                        | efflux                    | 3.945       |
| <i>qacE<math>\Delta</math>1</i>           | MDR                        | efflux                    | 0.071       |
| <i>oprD</i>                               | MDR                        | efflux                    | 2.443       |
| <i>oprJ</i>                               | MDR                        | efflux                    | 2.379       |
| <i>ttgA</i>                               | MDR                        | efflux                    | 2.519       |
| <i>mepA</i>                               | MDR                        | efflux                    | 1.063       |
| <i>mexE</i>                               | MDR                        | efflux                    | 2.087       |
| <i>mexF</i>                               | MDR                        | efflux                    | 3.307       |
| <i>acrA</i>                               | MDR                        | efflux                    | 0.223       |
| <i>acrA</i>                               | MDR                        | efflux                    | 0.108       |
| <i>tolC</i>                               | MDR                        | efflux                    | 35.518      |
| <i>tolC</i>                               | MDR                        | efflux                    | 112.163     |
| <i>qacE<math>\Delta</math>1</i>           | MDR                        | efflux                    | 3.814       |
| <i>ISPps</i>                              | insertional seq.           | MGE                       | 3.564       |
| <i>ISSm2</i>                              | insertional seq.           | MGE                       | 10.342      |
| <i>ISAbas3</i>                            | insertional seq.           | MGE                       | 2.744       |
| <i>intI1</i>                              | integrase                  | MGE                       | 5.762       |
| <i>intI1</i>                              | integrase                  | MGE                       | 2.396       |
| <i>intI1</i>                              | integrase                  | MGE                       | 0.706       |
| <i>IncP_oriT</i>                          | plasmid incomp.            | MGE                       | 22.363      |
| <i>repA</i>                               | plasmid replication        | MGE                       | 0.735       |
| IS6 <i>tnpA</i> , IS26, ISG 6, Tn24, Tn25 | transposase                | MGE                       | 0.395       |
| IS6 Group, <i>tnpA</i> , IS6100, ISG 6    | transposase                | MGE                       | 0.229       |
| IS4 Group, <i>tnpA</i> , IS4, ISG 4, Tn22 | transposase                | MGE                       | 448.695     |
| IS21 Group, <i>tnpA</i> , Tn21, ISG 21    | transposase                | MGE                       | 5.049       |
| IS6 Group, IS1216                         | transposase                | MGE                       | 2.116       |
| IS6 Group, <i>tnpA</i>                    | transposase                | MGE                       | 0.350       |
| <i>lmrA</i>                               | MLSB                       | efflux                    | 0.100       |
| <i>ermC</i>                               | MLSB                       | protection                | 12.592      |
| <i>sul2</i>                               | sulfonamide                | protection                | 0.730       |
| <i>sul2</i>                               | sulfonamide                | protection                | 0.744       |
| <i>sul1</i>                               | sulfonamide                | protection                | 2.166       |
| <i>tetPB</i>                              | tetracycline               | protection                | 1.865       |
| <i>tetE</i>                               | tetracycline               | efflux                    | 303.914     |

**Table S4.** Fold changes of ARGs calculated for R-sprinkler water, using D-sprinkler water as reference (sampling-1). Entries sorted by decreasing fold change. Equal abundance at fold change 0.053, indicated by horizontal line.

| Gene Name                                 | Target Antibiotics (Major) | Functional Classification | Fold Change |
|-------------------------------------------|----------------------------|---------------------------|-------------|
| <i>qacEΔ1</i>                             | MDR                        | efflux                    | 37.135      |
| <i>aadA</i>                               | aminoglycoside             | deactivate                | 32.050      |
| <i>aadA</i>                               | aminoglycoside             | deactivate                | 26.101      |
| <i>qacEΔ1</i>                             | MDR                        | efflux                    | 23.516      |
| IS6 <i>tnpA</i> , IS26, ISG 6, Tn24, Tn25 | transposase                | MGE                       | 23.343      |
| <i>aadA</i>                               | aminoglycoside             | deactivate                | 17.347      |
| <i>aadA</i>                               | aminoglycoside             | deactivate                | 9.885       |
| <i>qacEΔ1</i>                             | MDR                        | efflux                    | 8.978       |
| <i>strB</i>                               | aminoglycoside             | deactivate                | 7.226       |
| <i>qacH</i>                               | MDR                        | efflux                    | 6.889       |
| <i>sul1</i>                               | sulfonamide                | protection                | 6.144       |
| IS4 Group, <i>tnpA</i> , IS4, ISG 4, Tn22 | transposase                | MGE                       | 4.860       |
| <i>intI1</i>                              | integrase                  | MGE                       | 3.651       |
| <i>tolC</i>                               | MDR                        | efflux                    | 3.400       |
| <i>tolC</i>                               | MDR                        | efflux                    | 3.119       |
| <i>acrB</i>                               | MDR                        | efflux                    | 2.787       |
| <i>intI3</i>                              | integrase                  | MGE                       | 2.684       |
| <i>intI3</i>                              | integrase                  | MGE                       | 2.320       |
| <i>aadA</i>                               | aminoglycoside             | deactivate                | 1.910       |
| <i>blaCMY</i>                             | β-lactam                   | deactivate                | 1.764       |
| IS6 Group, IS1216                         | transposase                | MGE                       | 1.721       |
| <i>mdtF</i>                               | MDR                        | efflux                    | 1.545       |
| <i>aadA</i>                               | aminoglycoside             | deactivate                | 1.306       |
| <i>mdtH</i>                               | MDR                        | efflux                    | 1.287       |
| IS6 Group, <i>tnpA</i>                    | transposase                | MGE                       | 1.153       |
| <i>tolC</i>                               | MDR                        | efflux                    | 1.125       |
| <i>blaCMY</i>                             | β-lactam                   | deactivate                | 1.089       |
| <i>mdtL</i>                               | amphenicol                 | efflux                    | 1.072       |
| <i>blaTEM</i>                             | β-lactam                   | deactivate                | 0.999       |
| <i>lmrA</i>                               | MLSB                       | efflux                    | 0.833       |
| <i>mdtE</i>                               | MDR                        | efflux                    | 0.800       |
| <i>aac3-VI</i>                            | aminoglycoside             | deactivate                | 0.735       |
| <i>acrA</i>                               | MDR                        | efflux                    | 0.678       |
| <i>acrR</i>                               | MDR                        | regulator                 | 0.573       |
| <i>bacA</i>                               | other                      | deactivate                | 0.556       |
| <i>ampC</i>                               | β-lactam                   | deactivate                | 0.543       |
| KPC                                       | β-lactam                   | deactivate                | 0.496       |
| <i>mdtG</i>                               | MDR                        | efflux                    | 0.440       |
| <i>tetE</i>                               | tetracycline               | efflux                    | 0.337       |
| <i>qnrB</i>                               | quinolone                  | protection                | 0.322       |
| <i>ampC</i>                               | β-lactam                   | deactivate                | 0.313       |
| <i>acrA</i>                               | MDR                        | efflux                    | 0.301       |
| <i>ttgA</i>                               | MDR                        | efflux                    | 0.277       |
| <i>acrA</i>                               | MDR                        | efflux                    | 0.273       |

|                                        |                     |            |        |
|----------------------------------------|---------------------|------------|--------|
| <i>rarD</i>                            | amphenicol          | efflux     | 0.241  |
| <i>tetA</i>                            | tetracycline        | efflux     | 0.226  |
| <i>marR</i>                            | MDR                 | regulator  | 0.222  |
| <i>bacA</i>                            | other               | deactivate | 0.221  |
| <i>mepA</i>                            | MDR                 | efflux     | 0.198  |
| <i>blaOXA</i>                          | $\beta$ -lactam     | deactivate | 0.171  |
| <i>intI1</i>                           | integrase           | MGE        | 0.159  |
| <i>intI1</i>                           | integrase           | MGE        | 0.155  |
| <i>aadA5</i>                           | aminoglycoside      | deactivate | 0.143  |
| <i>yidY/mdtL</i>                       | amphenicol          | efflux     | 0.138  |
| <i>intI1</i>                           | integrase           | MGE        | 0.130  |
| <i>mexE</i>                            | MDR                 | efflux     | 0.126  |
| <i>vanSC</i>                           | vancomycin          | protection | 0.116  |
| <i>sul2</i>                            | sulfonamide         | protection | 0.099  |
| <i>mexF</i>                            | MDR                 | efflux     | 0.088  |
| <i>rarD</i>                            | amphenicol          | efflux     | 0.082  |
| <i>oprD</i>                            | MDR                 | efflux     | 0.060  |
| <i>IncP_oriT</i>                       | plasmid incomp.     | MGE        | 0.036  |
| <i>blaFOX</i>                          | $\beta$ -lactam     | deactivate | 0.025  |
| <i>ISSm2</i>                           | insertional seq.    | MGE        | 0.022  |
| <i>repA</i>                            | plasmid replication | MGE        | 0.015  |
| <i>merA</i>                            | mercury             | deactivate | 0.008  |
| <i>ISPps</i>                           | insertional seq.    | MGE        | 0.007  |
| IS6 Group, <i>tnpA</i> , IS6100, ISG 6 | transposase         | MGE        | 0.003  |
| IS21 Group, <i>tnpA</i> , Tn21, ISG 21 | transposase         | MGE        | 0.0002 |
| <i>pAKD1</i>                           | plasmid replication | MGE        | 0.0001 |
